# Supplementary material
Source: PubMed Central journal article supplement (PMC5686585)
Supplement: JB.00268-17_zjb023174574s1.pdf [file JB.00268-17_zjb023174574s1.pdf]

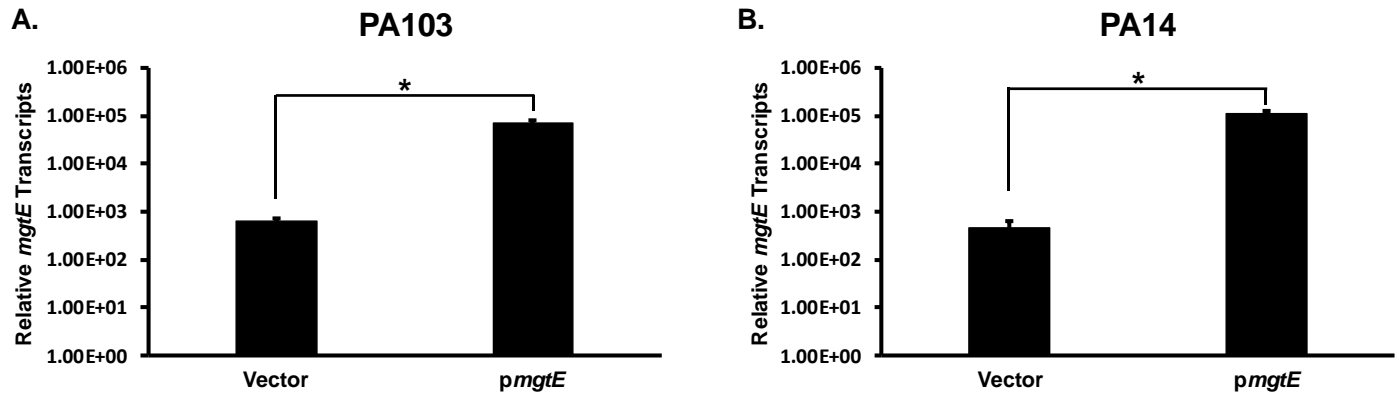

**Supplemental Figure 1.** Measurement of *mgtE* transcript levels in PA103 and PA14. *mgtE* levels were quantified by qRT-PCR in PA103 and PA14 containing either vector control or *pmgtE*. *fbp* was used as a normalization control transcript. \* $p < 0.05$ . These fold increases are on the same order of magnitude as seen after antibiotic treatment or under magnesium limitation conditions (29, 30).

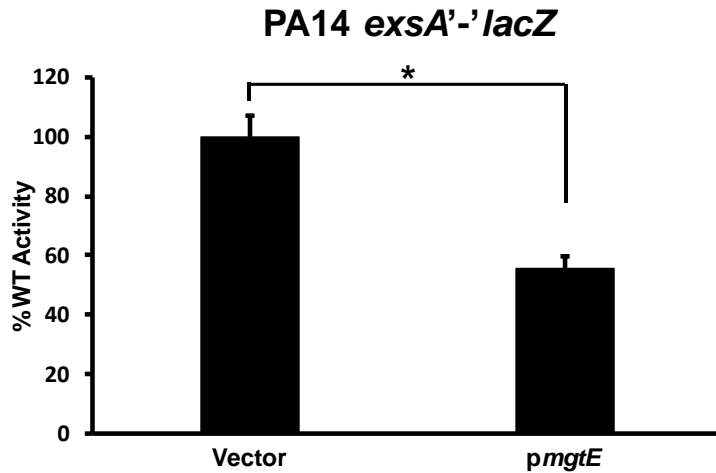

**Supplemental Figure 2.** *mgtE* expression represses *exsA* translation in *P. aeruginosa* PA14. *exsA* translational reporter strain PA14 *exsCEBA*'-'*lacZ*, with either vector control or *pmgtE* were assayed under T3SS inducing (+EGTA) conditions for beta-galactosidase activity. Percent activity was calculated considering the *lacZ* activity from the respective strain with the blank vector as 100%. The reporter constructs were transcribed from a constitutive  $P_{lacUV5}$  promoter. \* $p < 0.05$ .

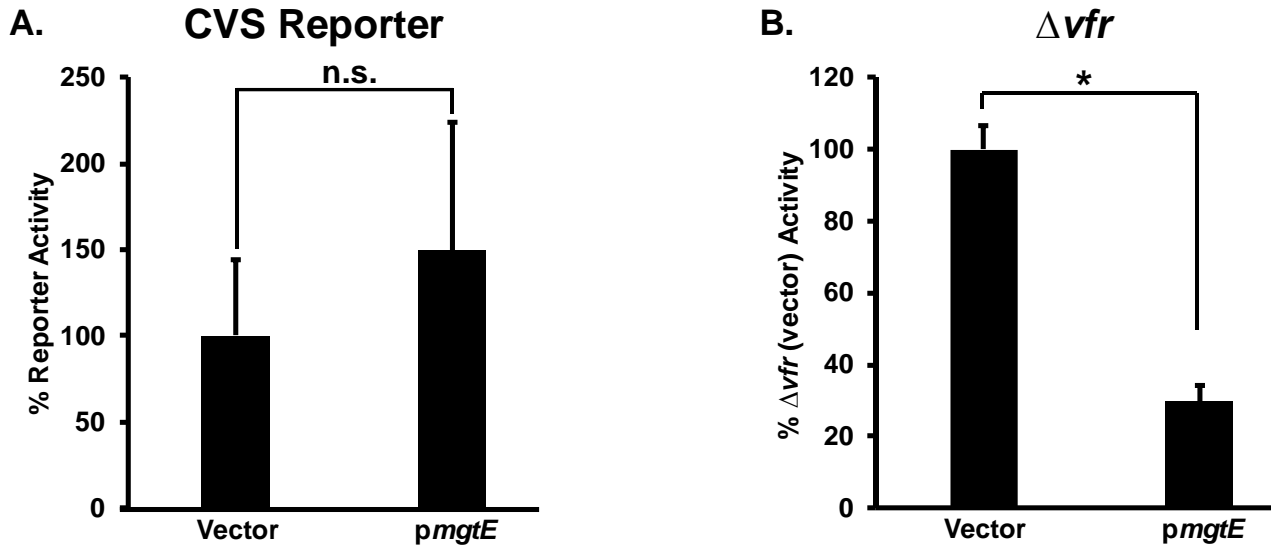

**Supplemental Figure 3.** The CVS cascade is not required for *mgtE*-mediated inhibition. (A) *mgtE* expression does not repress CVS reporter activity. PA103 CVS reporter strains with either vector control (Vector) or *pmgtE* were assayed for beta-galactosidase activity from the CVS reporter under T3SS inducing conditions (+EGTA). n.s.=not significant. (B) *mgtE* inhibits T3SS gene transcription in a  $\Delta vfr$  background.  $\Delta vfr$  strains with either vector control (Vector) or *pmgtE* were cultured under T3SS inducing (+EGTA) conditions and assayed for beta-galactosidase activity from the  $P_{\text{exsD}}-lacZ$  reporter construct. Percent activity was calculated considering the  $P_{\text{exsD}}-lacZ$  activity in the  $\Delta vfr$  strain with blank vector as 100%. \* $p < 0.005$ .

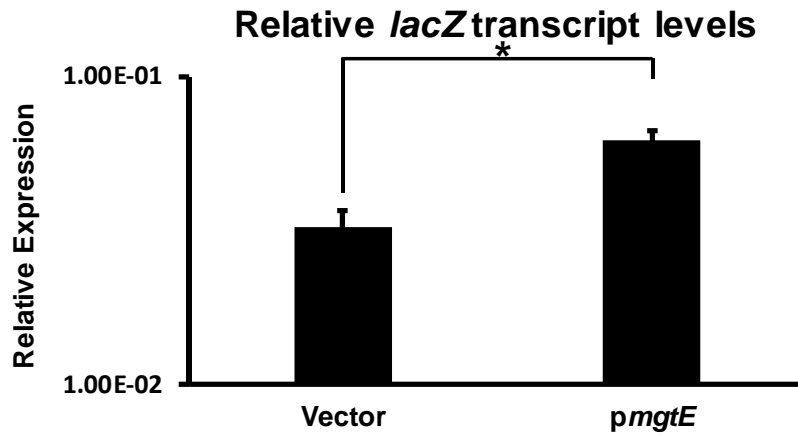

**Supplemental Figure 4.** *mgtE* expression does not repress *exsA* transcript stability. mRNA was isolated from the *exsA*'-'*lacZ* translational reporter strain with either the blank vector or with *pmgtE* and *exsA*'-'*lacZ* transcript stability was analyzed by qRT-PCR. *lacZ* transcript abundance was normalized to that of the control transcript *fbp*. \* $p < 0.05$ .

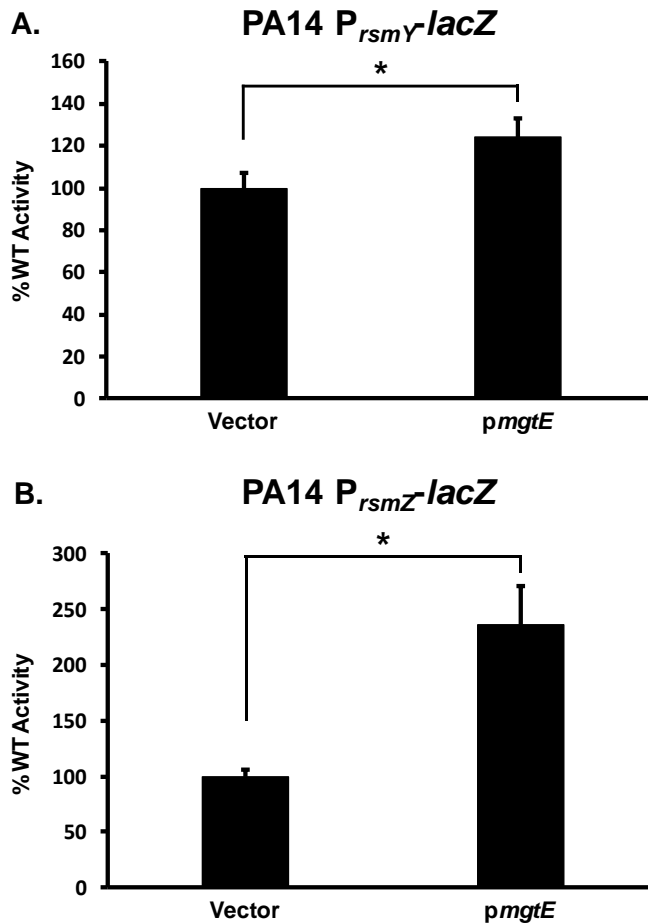

**Supplemental Figure 5.** *mgtE* expression affects *rsm* transcription in *P. aeruginosa* PA14. *rsmY* and *rsmZ* transcriptional reporter strains (A) PA14 P<sub>rsmY</sub>-lacZ and (B) PA14 P<sub>rsmZ</sub>-lacZ, with either vector control or *pmgtE* were assayed under T3SS inducing (+EGTA) conditions for beta-galactosidase activity. Percent activity was calculated considering the *lacZ* activity from the respective reporter strains with the blank vector as 100%. \**p*<0.05.
